# Supplementary material for: DebrisInterMixing-2.3: a finite volume solver for three-dimensionaldebris-flow simulations with two calibration parameters – Part 1: Model description
Source: Copernicus journal article supplement (doi:10.5194/gmd-9-2909-2016), 2016-08-31
Supplement: Supplementary file [file gmd-9-2909-2016-supplement-title-page.pdf › gmd-9-2909-2016-supplement-title-page.pdf]

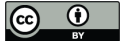

## *Supplement of*

# **DebrisInterMixing-2.3: a finite volume solver for three-dimensional debris-flow simulations with two calibration parameters – Part 1: Model description**

**Albrecht von Boetticher et al.**

*Correspondence to:* Albrecht von Boetticher (albrecht.vonboetticher@usys.ethz.ch)

- gmd-9-2909-2016-supplement-title-page.pdf
- applications
  - README.pdf
  - run
    - \* 10\_4060\_0,285
  - solvers
    - \* multiphase
  - transportModels
    - \* Allwmake
    - \* compressible
    - \* immiscibleIncompressibleTwoPhaseMixture
    - \* incompressible
    - \* interfaceProperties
    - \* twoPhaseMixture
    - \* twoPhaseProperties

The copyright of individual parts of the supplement might differ from the CC-BY 3.0 licence.
